# Supplementary material for: Assessment of windstorm-damage relations in the complex terrain of Norway
Source: Copernicus journal article supplement (doi:10.5194/nhess-2023-193), 2023-11-17
Supplement: Supplementary file 1 [file nhess-2023-193-supplement.pdf]

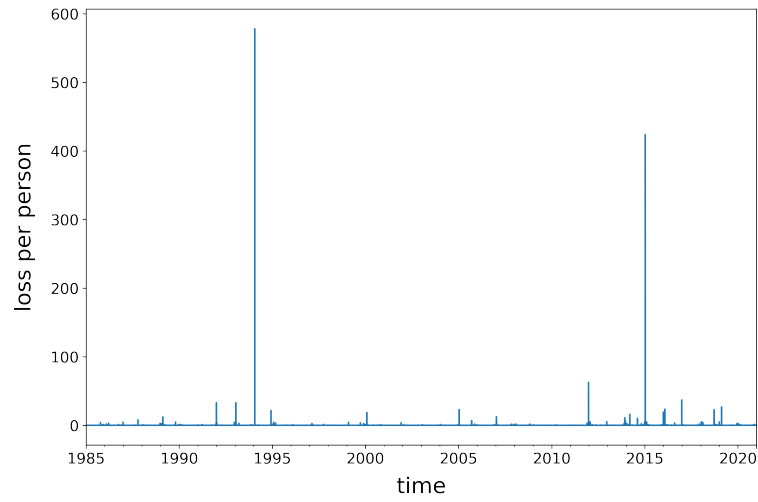

**Figure S1.** Example of time series of daily insurance loss per person (in NOK, 2015 values) for an arbitrary municipality.

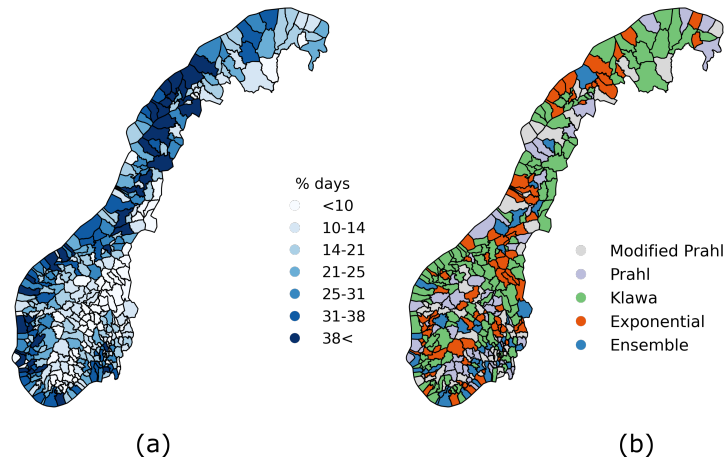

**Figure S2.** (a) Map showing the proportion of non-zero loss days above the 98th percentile wind speed in all Norwegian municipalities, (b) map indicating which models show the smallest MAE.

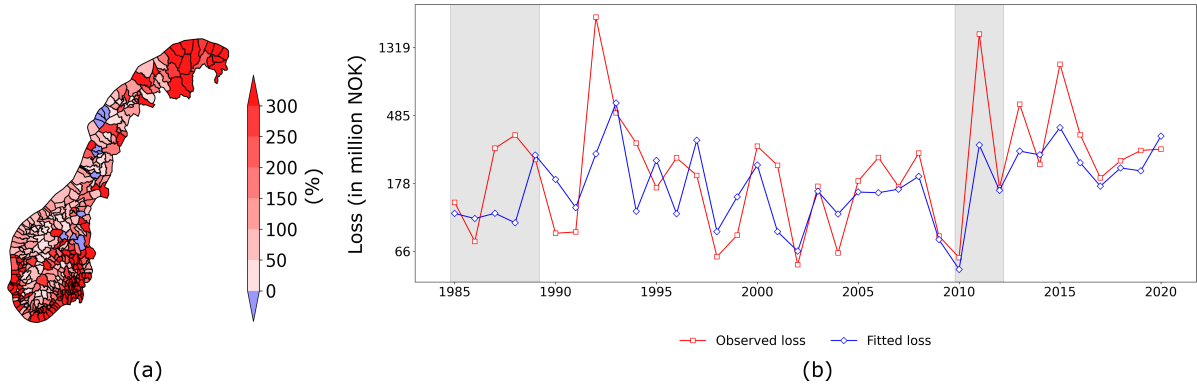

**Figure S3.** (a) Relative difference in the smallest MAE of storm damage functions fitted at municipality and national level, (b) annually-aggregated national losses using all the loss days from the insurance data (red line) along with the annual national loss estimates (blue line), which are the sum of each municipality's best-performing-model estimate. Note that the y-axis is logarithmic, and the shaded region represents the testing period.

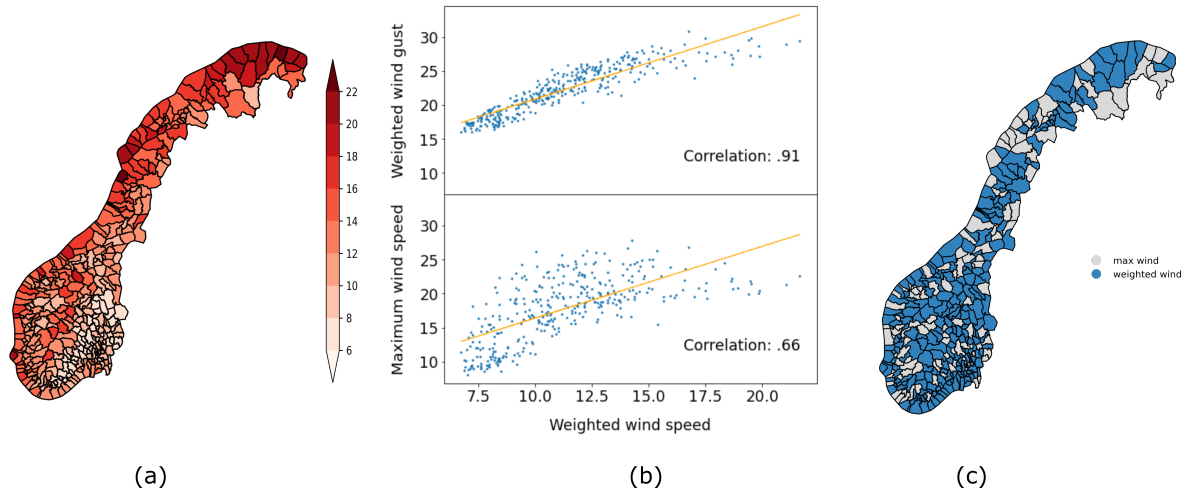

**Figure S4.** (a) Map showing the 98th percentile of the population-weighted daily maximum wind speed for each municipality for the period 1985-2020. (b) Spatial correlations between the 98th percentile of the population-weighted daily maximum wind speed and the 98th percentile of the population-weighted daily wind gust (top) and the 98th percentile of the daily maximum wind speed (bottom) and (c) municipalities with smallest CV among the five models with weighted and maximum wind speeds on test data. Municipalities in grey (blue) are where maximum (weighted) wind speed shows the lowest CV.

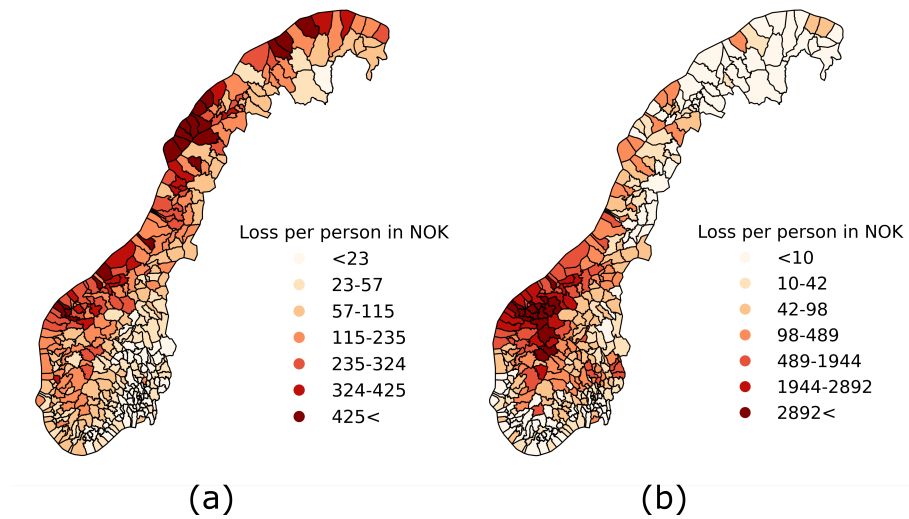

**Figure S5.** Maps of Norway showing (a) the annual average loss per person in each municipality during the study period 1985-2020 and (b) the average loss per person in each municipality caused by the storm Dagmar (25.12.2011-27.12.2011). To account for the skewness involved in the loss data and for meaningful visualization, the loss is split non-linearly with class boundaries at the 20th, 40th, 60th, 80th, 90th and 95th percentiles.

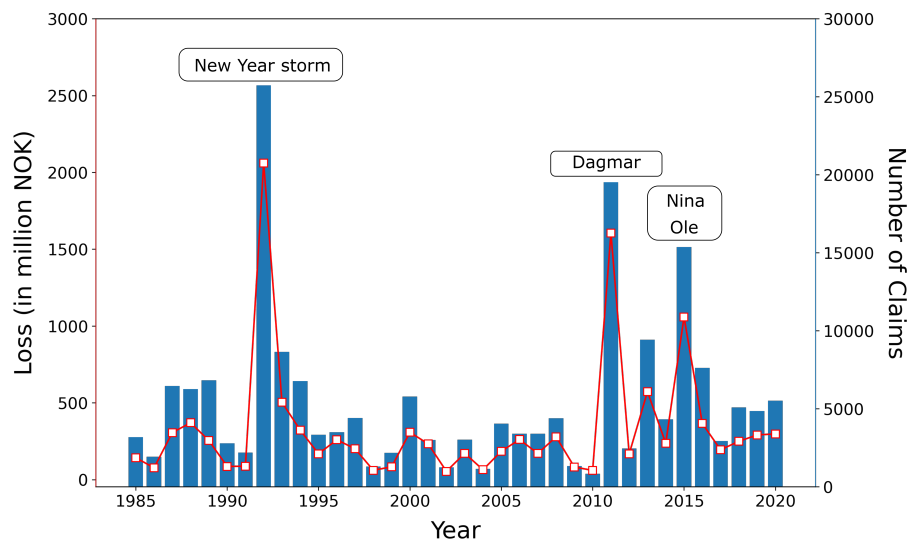

**Figure S6.** Annual number of insurance claims (blue bars) and monetary losses (red line, 2015 inflation-adjusted) associated with strong wind events in Norway from 1985 to 2020.

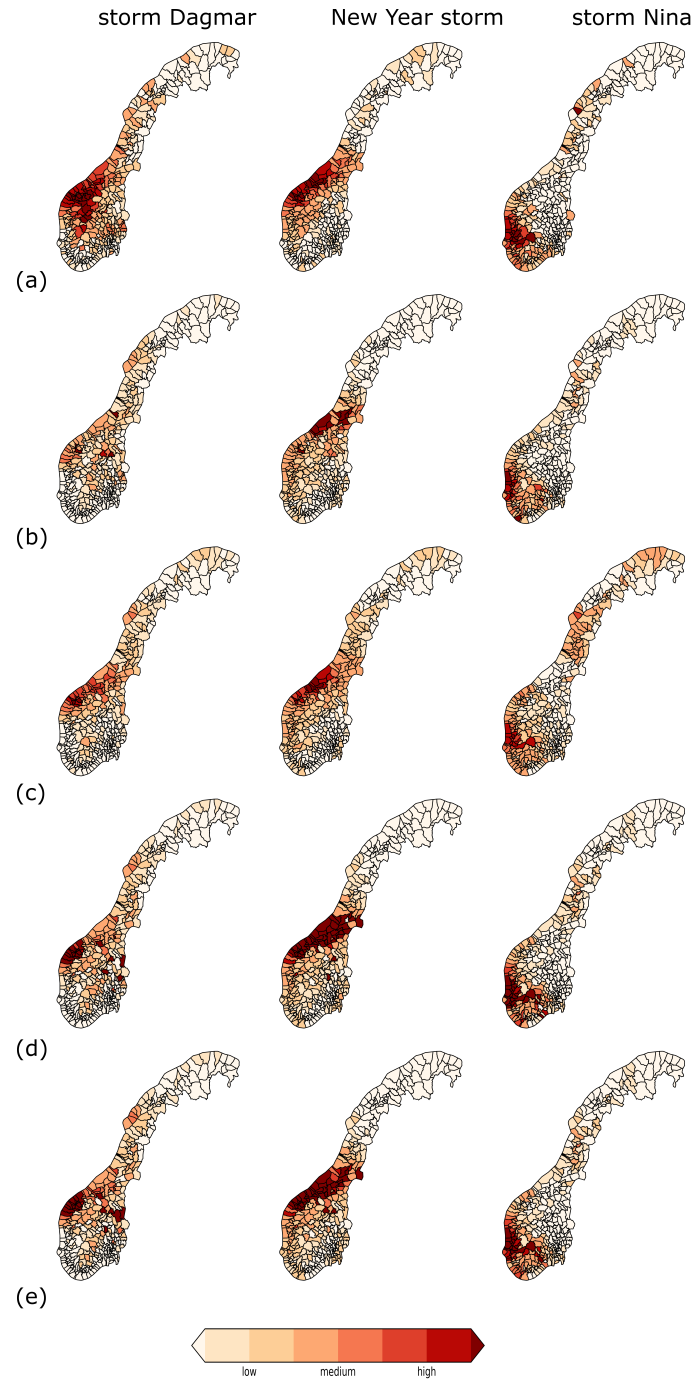

**Figure S7.** Spatial patterns of observed and estimated losses for the three most damaging events, where (a) display the observed losses and (b), (c), (d) and (e) are their estimates from the exponential, Klaw, modified Prah and Prah models respectively. The class boundaries of the colour bar are the 20th, 40th, 60th, 80th, 85th, 90th and 95th percentiles of the observed losses of their respective events. Table S2 shows the spatial correlations between observed and estimated losses.

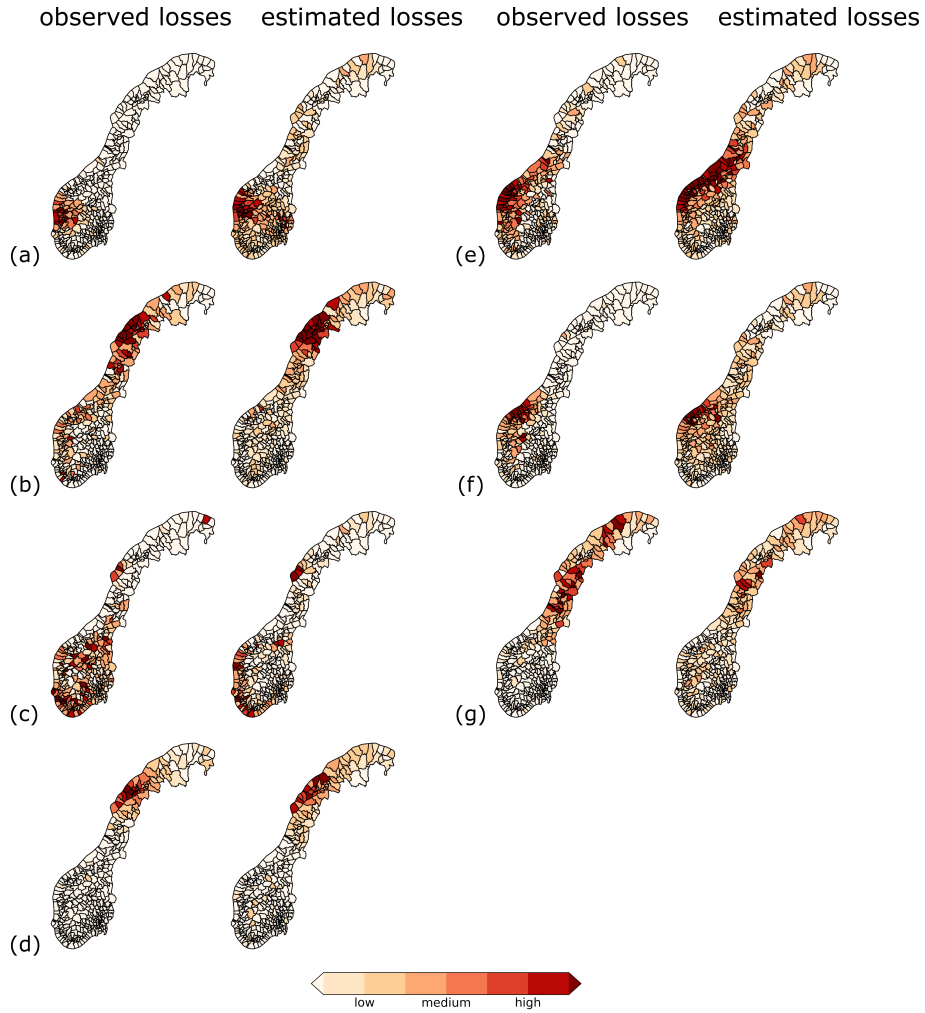

**Figure S8.** Spatial patterns of observed and estimated losses from the closest model to the observed loss for seven damaging events, where the panels represent (a) storm of 1994, (b) storm Ole, (c) storm of 1987, (d) storm Frode, (e) storm Tor, (f) storm of 1988 and (g) storm Narve. The Spearman rank correlation between observed and estimated losses of events are 0.46, 0.45, 0.44, 0.56, 0.51, 0.43 and 0.50 respectively. The class boundaries of the colour bar are the 20th, 40th, 60th, 80th, 85th, 90th and 95th percentiles of the observed losses of their respective events.

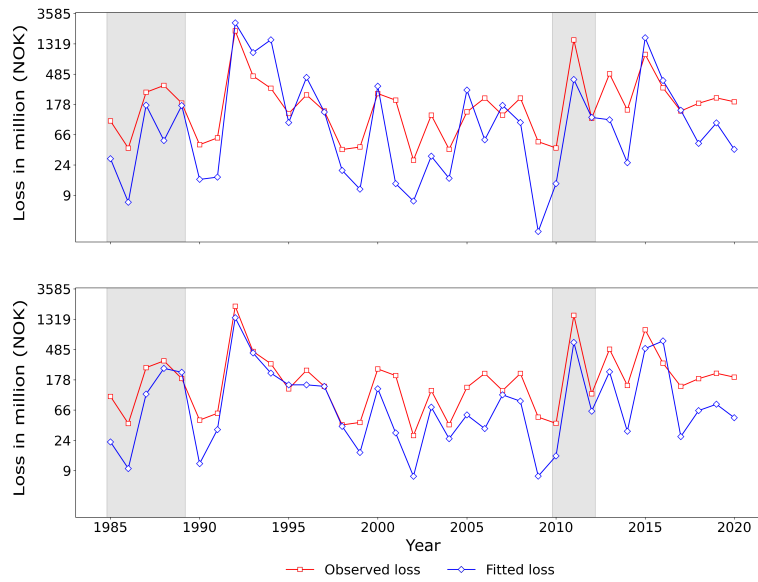

**Figure S9.** Annual time series of observed and estimated national losses for the extreme loss class from the deterministic exponential model (top) and deterministic model by Klawe (bottom). Note that the y-axis is logarithmic and the shaded region represents the testing period.

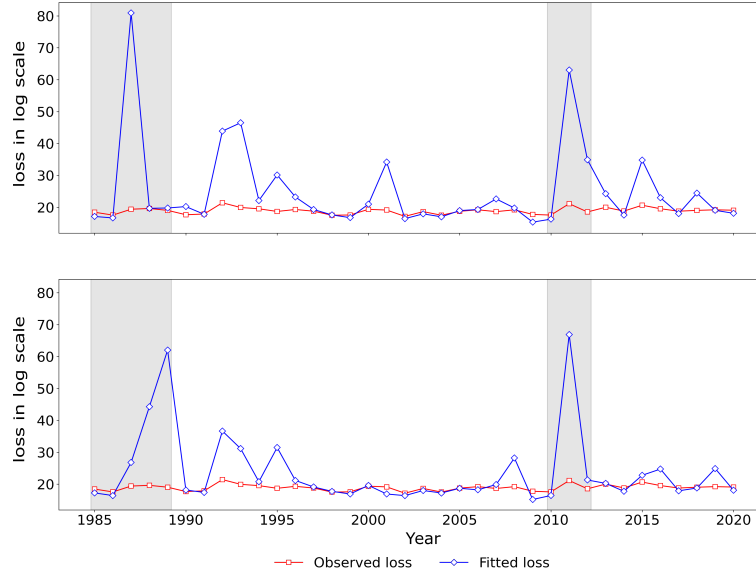

**Figure S10.** Same as Fig. S9 but using the probabilistic models: modified Prah model (top) and model by Prah (bottom). Note that the y-axis is logarithmic and the shaded region represents the testing period. Loss estimates from roughly 20% of the municipalities are responsible for the large margin between the observed and estimated losses.

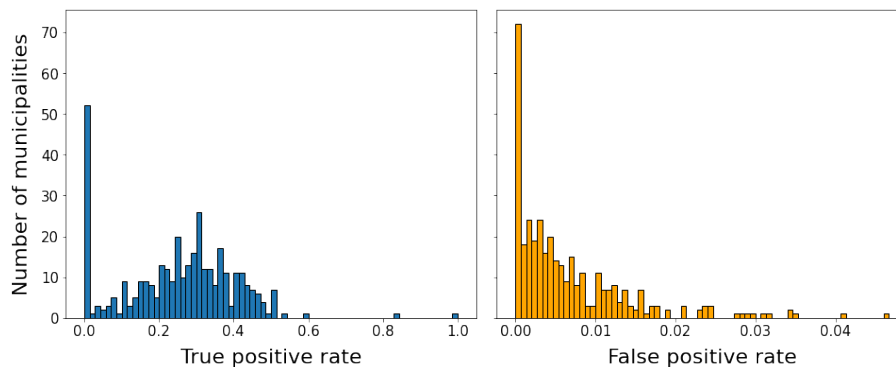

**Figure S11.** Distributions of the (left) true and (right) false positive rates of the damage classifier using the testing data.

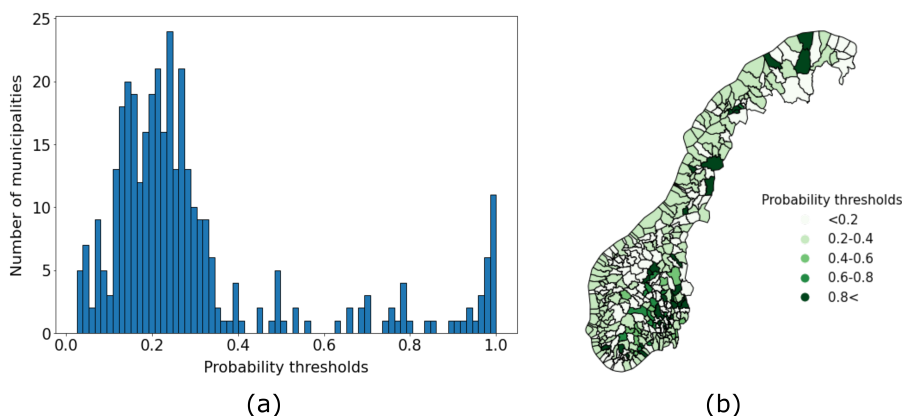

**Figure S12.** (a) Distribution of the probability thresholds for all municipalities and (b) map of the best probability thresholds for each municipality based on precision-recall curves and F-scores.

| Event          | Number of claims | Loss in million NOK (2015) | Period                  | Region of impact         |
|----------------|------------------|----------------------------|-------------------------|--------------------------|
| New Year storm | 22823            | 1933                       | 01.01.1992              | Western Norway           |
| Dagmar         | 14247            | 1274                       | 25.12.2011 - 27.12.2011 | Western Norway           |
| Nina           | 9525             | 593                        | 09.01.2015 - 12.01.2015 | South-west Norway        |
| Storm of 1994  | 5306             | 261                        | 23.01.1994              | South-west Norway        |
| Ole            | 2418             | 237                        | 07.02.2015 - 10.02.2015 | West and northern Norway |
| Storm of 1987  | 5014             | 235                        | 16.10.1987 - 17.10.1987 | Southern Norway          |
| Frode          | 2876             | 234                        | 12.10.1996 - 13.10.1996 | Northern Norway          |
| Tor            | 3940             | 214                        | 29.01.2016 - 31.01.2016 | Western Norway           |
| Storm of 1988  | 2853             | 184                        | 22.12.1988 - 23.12.1988 | Central western Norway   |
| Narve          | 2080             | 182                        | 17.01.2006 - 24.01.2006 | Northern Norway          |

**Table S1.** Features of then most damaging storm events that occurred in Norway during the study period (1985-2020). The event periods are as defined by Norwegian Natural Perils Pool.

| Damage function | New year storm | storm Dagmar | storm Nina |
|-----------------|----------------|--------------|------------|
| Exponential     | 0.57           | 0.64         | 0.66       |
| Klawa           | 0.53           | 0.68         | 0.57       |
| Modified Prahl  | 0.58           | 0.66         | 0.68       |
| Prahl           | 0.58           | 0.67         | 0.67       |

**Table S2.** Spearman’s rank correlation between observed and estimated losses of individual models for the three most damaging events.

| Event          | Accuracy (%) | Recall (%) |
|----------------|--------------|------------|
| New Year storm | 75.5         | 77         |
| Dagmar         | 66.6         | 63.4       |
| Nina           | 76.7         | 71.5       |
| Storm of 1994  | 69.7         | 86.7       |
| Ole            | 69.7         | 60         |

**Table S3.** Classification accuracies and recall scores for the top five damaging wind events in Norway ordered with decreasing monetary loss (see Table S1). The accuracy column shows the proportion of municipalities in which the damage classifier accurately predicts both the events and non-events. Recall scores indicate the proportion of municipalities where the damage classifier was able to predict an event that actually occurred.
